# Supplementary material for: A Mobile Phone App Designed to Support Weight Loss Maintenance and Well-Being (MotiMate): Randomized Controlled Trial
Source: PubMed Central journal article supplement (PMC6834303; doi:10.2196/12882), 2019-09-04
Supplement: mhealth_v7i9e12882_app2.pdf [file mhealth_v7i9e12882_app2.pdf]

**Multimedia Appendix 2. Adjusted means and standard errors (SE) for primary outcomes presented by week and app condition.**

| Variables                                        | Intervention |       |       |       |       | Control |       |       |       |       | Model outcomes            |                           |                           |             |
|--------------------------------------------------|--------------|-------|-------|-------|-------|---------|-------|-------|-------|-------|---------------------------|---------------------------|---------------------------|-------------|
|                                                  | Week         | 0     | 4     | 8     | 12    | 24      | 0     | 4     | 8     | 12    | 24                        | Time                      | Intervention              | Interaction |
| <b>Satisfaction with Life (SWLS)<sup>a</sup></b> |              |       |       |       |       |         |       |       |       |       |                           |                           |                           |             |
| Mean                                             | 25.41        | 25.75 | 26.7  | 26.47 | 26.01 | 22.75   | 24.45 | 24.8  | 25.56 | 25.76 | F(4,63.0)=3.96,<br>P<0.01 | F(1,75.2)=2.58,<br>P=0.11 | F(4,63)=2.09,<br>P=0.09   |             |
| SE                                               | 0.75         | 0.8   | 0.81  | 0.78  | 0.76  | 0.77    | 0.86  | 0.87  | 0.83  | 0.8   |                           |                           |                           |             |
| <b>Depression<sup>a</sup></b>                    |              |       |       |       |       |         |       |       |       |       |                           |                           |                           |             |
| Mean                                             | 1.82         | 1.85  | 2.77  | 2.22  | 2.62  | 2.36    | 2.18  | 1.92  | 2.77  | 2.36  | F(4,63.0)=0.82,<br>P=0.52 | F(1,59.4)=0.03,<br>P=0.86 | F(4,63.0)=1.99,<br>P=0.11 |             |
| SE                                               | 0.33         | 0.32  | 0.37  | 0.48  | 0.54  | 0.34    | 0.35  | 0.41  | 0.51  | 0.57  |                           |                           |                           |             |
| <b>Anxiety<sup>a</sup></b>                       |              |       |       |       |       |         |       |       |       |       |                           |                           |                           |             |
| Mean                                             | 2.15         | 1.97  | 1.85  | 1.66  | 1.78  | 2.6     | 1.43  | 2.17  | 2.24  | 1.81  | F(4,63.9)=2.42,<br>P=0.06 | F(1,70.4)=0.20,<br>P=0.66 | F(4,63.9)=2.69,<br>P=0.04 |             |
| SE                                               | 0.33         | 0.33  | 0.35  | 0.38  | 0.39  | 0.34    | 0.36  | 0.37  | 0.41  | 0.42  |                           |                           |                           |             |
| <b>Stress<sup>a</sup></b>                        |              |       |       |       |       |         |       |       |       |       |                           |                           |                           |             |
| Mean                                             | 4.99         | 4.81  | 4.23  | 4.7   | 4.89  | 4.45    | 4.05  | 4.23  | 5.02  | 3.78  | F(4,65.5)=1.16,<br>P=0.34 | F(1,69.7)=0.52,<br>P=0.47 | F(4,65.5)=0.75,<br>P=0.56 |             |
| SE                                               | 0.53         | 0.48  | 0.56  | 0.66  | 0.58  | 0.54    | 0.52  | 0.61  | 0.71  | 0.62  |                           |                           |                           |             |
| <b>Positive Affect<sup>a</sup></b>               |              |       |       |       |       |         |       |       |       |       |                           |                           |                           |             |
| Mean                                             | 36.67        | 36.5  | 35.48 | 36.39 | 35.39 | 35.69   | 35.29 | 35.91 | 34.36 | 34.86 | F(4,65.3)=0.69,<br>P=0.41 | F(1,75.5)=0.51,<br>P=0.73 | F(4,65.4)=0.42,<br>P=0.79 |             |
| SE                                               | 0.92         | 0.91  | 1.21  | 1.22  | 1.1   | 0.94    | 0.99  | 1.32  | 1.31  | 1.15  |                           |                           |                           |             |
| <b>Negative Affect<sup>a</sup></b>               |              |       |       |       |       |         |       |       |       |       |                           |                           |                           |             |
| Mean                                             | 16.76        | 16.9  | 17    | 16.98 | 17.99 | 19.11   | 17.26 | 17.3  | 18.55 | 14.8  | F(4,65.4)=1.90,<br>P=0.12 | F(1,72.0)=0.12,<br>P=0.73 | F(4,65.5)=5.14,<br>P=0.01 |             |
| SE                                               | 0.69         | 0.65  | 0.83  | 0.94  | 0.87  | 0.71    | 0.71  | 0.9   | 1.01  | 0.93  |                           |                           |                           |             |
| <b>Happiness score<sup>a</sup></b>               |              |       |       |       |       |         |       |       |       |       |                           |                           |                           |             |
| Mean                                             | 3.17         | 3.1   | 3.08  | 3.08  | 3.28  | 3.48    | 3.21  | 3.05  | 3.28  | 3.38  | F(4,69.2)=2.36,<br>P=0.06 | F(1,74.7)=0.60,<br>P=0.44 | F(4,69.3)=0.72,<br>P=0.58 |             |
| SE                                               | 0.18         | 0.14  | 0.13  | 0.16  | 0.2   | 0.19    | 0.15  | 0.14  | 0.17  | 0.21  |                           |                           |                           |             |
| <b>Percentage time happy<sup>a</sup></b>         |              |       |       |       |       |         |       |       |       |       |                           |                           |                           |             |
| Mean                                             | 65.48        | 68.96 | 68.59 | 68.94 | 66.6  | 65.33   | 62.54 | 62.55 | 64.17 | 63.99 | F(4,63.5)=0.24,<br>P=0.91 | F(1,76.9)=1.30,<br>P=0.26 | F(4,63.5)=1.19,<br>P=0.32 |             |
| SE                                               | 2.91         | 2.82  | 3.04  | 2.89  | 3.49  | 2.99    | 3.03  | 3.29  | 3.07  | 3.72  |                           |                           |                           |             |
| <b>Percentage time unhappy<sup>a</sup></b>       |              |       |       |       |       |         |       |       |       |       |                           |                           |                           |             |
| Mean                                             | 14.52        | 13.92 | 12.48 | 13.06 | 12.68 | 14.19   | 15.73 | 13.55 | 13.61 | 12.11 | F(4,65.5)=1.37,<br>P=0.25 | F(1,73.3)=0.14,<br>P=0.71 | F(4,65.6)=0.44,<br>P=0.78 |             |
| SE                                               | 1.34         | 1.29  | 1.27  | 1.44  | 1.4   | 1.38    | 1.42  | 1.41  | 1.57  | 1.53  |                           |                           |                           |             |
| <b>Percentage weight change<sup>b</sup></b>      |              |       |       |       |       |         |       |       |       |       |                           |                           |                           |             |
| Mean                                             | na           | -0.64 | -0.55 | -0.09 | 0.39  | na      | -0.57 | -0.34 | -0.40 | -0.52 | F(3,61.8)=0.84,<br>P=0.48 | F(1,69.2)=0.22,<br>P=0.64 | F(3,61.8)=0.78,<br>P=0.51 |             |
| SE                                               | na           | 0.25  | 0.38  | 0.44  | 0.57  | na      | 0.27  | 0.43  | 0.48  | 0.62  |                           |                           |                           |             |

Significant comparisons; SWLS: Baseline to Week 8 (P=.046); Baseline to Week 12 (P<.01); Baseline to Week 24 (P=.01); Anxiety: Baseline to Week 4 (P=.02) in the control group; Negative Affect: Intervention and control different at Baseline (P=.02) and Week 24 (P=.01) Baseline to Week 44 (P<.001) and week 12 to week 24 (P=.01) in the control group.

<sup>a</sup>Means adjusted for participant sex and age, neuroticism, self-esteem and dispositional optimism.

<sup>b</sup>Means adjusted for sex and age only.
