# Supplementary material for: A Mobile Phone App Designed to Support Weight Loss Maintenance and Well-Being (MotiMate): Randomized Controlled Trial
Source: PubMed Central journal article supplement (PMC6834303; doi:10.2196/12882), 2019-09-04
Supplement: mhealth_v7i9e12882_app3.pdf [file mhealth_v7i9e12882_app3.pdf]

### Multimedia Appendix 3. Adjusted means and standard errors (SE) for secondary study outcomes.

| Variables                                           | Intervention |        |        |        |        | Control |        |        |        |        | Model outcomes   |                   |                  |                 |
|-----------------------------------------------------|--------------|--------|--------|--------|--------|---------|--------|--------|--------|--------|------------------|-------------------|------------------|-----------------|
|                                                     | Week         | 0      | 4      | 8      | 12     | 24      | 0      | 4      | 8      | 12     | 24               | Time              | Interven<br>tion | Interacti<br>on |
| <b>Weight Loss Self-Efficacy (WLSE)<sup>a</sup></b> |              |        |        |        |        |         |        |        |        |        |                  |                   |                  |                 |
| Mean                                                | 120.39       | 125.57 | 131.26 | 130.26 | 126.94 | 113.90  | 121.12 | 128.08 | 126.59 | 131.61 | F(4,63.5)=       | F(1,81.1)         | F(4,63.5)        |                 |
| SE                                                  | 4.58         | 5.10   | 5.13   | 5.38   | 5.01   | 4.71    | 5.39   | 5.48   | 5.70   | 5.25   | =5.99,<br>P<.001 | =0.18,<br>P=.67   | =1.47,<br>P=.22  |                 |
| <b>Nutrition Self-Efficacy<sup>a</sup></b>          |              |        |        |        |        |         |        |        |        |        |                  |                   |                  |                 |
| Mean                                                | 15.84        | 16.27  | 16.35  | 16.7   | 16.37  | 15.56   | 15.94  | 16.06  | 16.37  | 15.7   | F(4,67.9)=       | F(1,79.7)         | F(4,67.9)        |                 |
| SE                                                  | 0.43         | 0.46   | 0.49   | 0.47   | 0.48   | 0.44    | 0.5    | 0.53   | 0.51   | 0.51   | 1.48,<br>P=0.217 | =0.56,<br>P=0.458 | =0.12,<br>P=.97  |                 |
| <b>Exercise Self-Efficacy<sup>a</sup></b>           |              |        |        |        |        |         |        |        |        |        |                  |                   |                  |                 |
| Mean                                                | 16.00        | 15.70  | 15.51  | 16.07  | 16.03  | 14.51   | 14.23  | 14.56  | 15.08  | 14.62  | F(4,66.0)=       | F(1,77.3)         | F(4,66.0)        |                 |
| SE                                                  | 0.49         | 0.56   | 0.64   | 0.69   | 0.6    | 0.51    | 0.6    | 0.69   | 0.74   | 0.63   | 0.71, P=.59      | =3.65,<br>P=.06   | =0.24,<br>P=.92  |                 |
| <b>Resilience<sup>a</sup></b>                       |              |        |        |        |        |         |        |        |        |        |                  |                   |                  |                 |
| Mean                                                | 3.74         | 3.79   | 3.86   | 3.96   | 3.67   | 3.63    | 3.78   | 3.87   | 3.74   | 3.89   | F(4,63.3)=       | F(1,76.7)         | F(4,63.3)        |                 |
| SE                                                  | 0.08         | 0.08   | 0.09   | 0.09   | 0.1    | 0.08    | 0.09   | 0.1    | 0.09   | 0.11   | 3.62, P=.01      | =0.05,<br>P=.82   | =2.87,<br>P=.03  |                 |
| <b>Coping Factor 1 (Active)<sup>a</sup></b>         |              |        |        |        |        |         |        |        |        |        |                  |                   |                  |                 |
| Mean                                                | 0.07         | 0.15   | 0.15   | 0.11   | -0.01  | 0.01    | -0.15  | -0.19  | -0.08  | 0.01   | F(4,60.8)=       | F(1,67.1)         | F(4,60.8)        |                 |
| SE                                                  | 0.16         | 0.17   | 0.18   | 0.2    | 0.18   | 0.16    | 0.17   | 0.19   | 0.21   | 0.19   | 0.07, P=.99      | =0.89,<br>P=.35   | =0.86,<br>P=.49  |                 |
| <b>Coping Factor 2 (Avoidant)<sup>a</sup></b>       |              |        |        |        |        |         |        |        |        |        |                  |                   |                  |                 |
| Mean                                                | 0.09         | 0.11   | 0.15   | 0.09   | 0.21   | -0.01   | -0.11  | -0.01  | 0.04   | -0.10  | F(4,64.0)=       | F(1,66.0)         | F(4,64.0)        |                 |
| SE                                                  | 0.12         | 0.15   | 0.17   | 0.18   | 0.16   | 0.12    | 0.16   | 0.18   | 0.18   | 0.17   | 0.09, P=.99      | =1.33,<br>P=.25   | =0.31,<br>P=.87  |                 |
| <b>Diet Quality<sup>b</sup></b>                     |              |        |        |        |        |         |        |        |        |        |                  |                   |                  |                 |
| Mean                                                | 55.4         | 56.54  | 58.73  | 59.45  | 56.96  | 55.67   | 55.85  | 55.41  | 55.94  | 57.11  | F(4,63.8)=       | F(1,80.5)         | F(4,63.8)        |                 |
| SE                                                  | 1.59         | 1.68   | 1.92   | 1.76   | 1.84   | 1.65    | 1.82   | 2.07   | 1.88   | 1.94   | 1.13, P=.35      | =0.47,<br>P=.50   | =1.20,<br>P=.32  |                 |
| <b>Total MET (mins exercise)<sup>b</sup></b>        |              |        |        |        |        |         |        |        |        |        |                  |                   |                  |                 |
| Mean                                                | 9236.2       | 9561.6 | 10403. | 9344.5 | 9373.0 | 8295.2  | 8230.2 | 8092.3 | 7167.1 | 9664.6 | F(4,66.2)=       | F(1,80.2)         | F(4,66.2)        |                 |
| SE                                                  | 834.45       | 781.33 | 1103.3 | 925.08 | 905.77 | 868.02  | 846.47 | 1213.0 | 986.33 | 953.1  | 1.05, P=.39      | =1.78,<br>P=.19   | =1.17,<br>P=.33  |                 |

<sup>a</sup>Means adjusted for participant sex and age, neuroticism, self-esteem and dispositional optimism.

<sup>b</sup>Means adjusted for sex and age only
